# Supplementary material for: Health-Related Lifestyles among University Students: Focusing on Eating Habits and Physical Activity
Source: MDPI journal article supplement (doi:10.3390/ijerph21050626), 2024-05-15
Supplement: s1 [file s1]

**Table S4.** Percentage of respondents that selected specific responses about physical activity

| <i>Do you practice physical/sporting activities?</i> | <b>Never</b> | <b>1-2 days a week</b> | <b>3-4 days a week</b> | <b>Five or more days a week</b> |
|------------------------------------------------------|--------------|------------------------|------------------------|---------------------------------|
| Physical activity (walking or cycling)               | 7.7          | 30.1                   | 30.3                   | 31.8                            |
| Physical exercise (gym, swimming pool)               | 42.7         | 35.5                   | 18.8                   | 3.0                             |
| Sports activity (football, volleyball, tennis)       | 73.8         | 16.4                   | 8.4                    | 1.4                             |

**Note.** National data suggests that 41.5% of the population aged 18-34 play sports continuously. 13.7% practice sports occasionally. 22.3% practice some physical activity. 22.5% do not practice either sport or physical activity. National data are taken from the public database of the national statistical institute (ISTAT, available at <http://dati.istat.it/>) and refer to the general Italian population.
