# Supplementary material for: Health-Related Lifestyles among University Students: Focusing on Eating Habits and Physical Activity
Source: MDPI journal article supplement (doi:10.3390/ijerph21050626), 2024-05-15
Supplement: s1 [file s1]

**Table S5.** Types of physical activity done by the sub-sample that overall fall into the intensive physical activity classification (N = 485, 7% of the total sample)

| <i>Do you practice physical/sporting activities?</i>                         | <i>N</i> | <i>%</i> |
|------------------------------------------------------------------------------|----------|----------|
| Physical exercise (gym, swimming pool ...) at least 3-4 times a week         | 163      | 33.6     |
| Sports activity (football, volleyball, tennis ...) at least 3-4 times a week | 91       | 18.8     |
| Both physical exercise and sports activity at least 3-4 times a week         | 231      | 47.6     |
