# Supplementary material for: Health-Related Lifestyles among University Students: Focusing on Eating Habits and Physical Activity
Source: MDPI journal article supplement (doi:10.3390/ijerph21050626), 2024-05-15
Supplement: s1 [file s1]

**Table S2.** Percentage of respondents that selected specific responses about fat consumption

|                                                                                                                                     | <b>Olive<br/>oil</b> | <b>Other vegetable<br/>fats and oils (seed<br/>oil, margarine)</b> | <b>Butter<br/>or lard</b> | <b>National<br/>Statistics (Olive<br/>oil and other<br/>vegetable fats)</b> |
|-------------------------------------------------------------------------------------------------------------------------------------|----------------------|--------------------------------------------------------------------|---------------------------|-----------------------------------------------------------------------------|
| <i>Which of the following fats do<br/>you use most frequently for<br/>cooking?</i>                                                  | <b>89.3</b>          | 6.3                                                                | 4.4                       | 96.2                                                                        |
| <i>Which of the following fats do<br/>you use most frequently for raw<br/>seasoning of foods (salads,<br/>pasta) or sandwiches?</i> | <b>97.2</b>          | 1.7                                                                | 1.1                       | 97.2                                                                        |

**Note.** Percentages in bold indicate adequate behavior (consistent with guidelines). National data are taken from the public database of the national statistical institute (ISTAT, available at <http://dati.istat.it/>) and refer to the general Italian population between 18-34 years.
