# Supplementary material for: Health-Related Lifestyles among University Students: Focusing on Eating Habits and Physical Activity
Source: MDPI journal article supplement (doi:10.3390/ijerph21050626), 2024-05-15
Supplement: s1 [file s1]

**Table S3.** Percentage of respondents that selected specific responses about salt consumption

|                                                                                               | <b>I have never<br/>paid<br/>attention</b> | <b>I have<br/>reduced its<br/>use over time</b> | <b>I have always<br/>paid attention</b> | <b>National<br/>Statistics</b> |
|-----------------------------------------------------------------------------------------------|--------------------------------------------|-------------------------------------------------|-----------------------------------------|--------------------------------|
| <i>Do you pay attention to the<br/>amount of salt and the<br/>consumption of salty foods?</i> | 27.0                                       | <b>37.6</b>                                     | <b>35.4</b>                             | 58.7                           |

**Note.** Percentages in bold indicate adequate behavior (consistent with guidelines). National data are taken from the public database of the national statistical institute (ISTAT, available at <http://dati.istat.it/>) and refer to the general Italian population between 18-34 years that declare to pay attention to salt consumption.
