# Supplementary material for: Health-Related Lifestyles among University Students: Focusing on Eating Habits and Physical Activity
Source: MDPI journal article supplement (doi:10.3390/ijerph21050626), 2024-05-15
Supplement: s1 [file s1]

**Table S1.** Percentage of respondents that selected specific responses about the frequency of food consumption

| <i>How often do you eat the following foods?</i> | <b>More than once a day</b> | <b>Once a day</b> | <b>A few times a week</b> | <b>Less than once a week</b> | <b>Never</b> | <b>National Statistics</b>          |
|--------------------------------------------------|-----------------------------|-------------------|---------------------------|------------------------------|--------------|-------------------------------------|
| Bread, pasta, rice                               | <b>34.8</b>                 | <b>46.3</b>       | 16.9                      | 1.7                          | 0.2          | 77.0 ( <i>At least once a day</i> ) |
| Cured meats                                      | 1.5                         | 9.1               | 56.1                      | <b>25.3</b>                  | <b>8.1</b>   | 64.0 ( <i>A few times a week</i> )  |
| White meats                                      | 2.5                         | 11.1              | <b>68.2</b>               | 13.8                         | 4.5          | 83.2 ( <i>A few times a week</i> )  |
| Beef                                             | 0.5                         | 3.6               | 52.2                      | <b>35.5</b>                  | <b>8.2</b>   | 65.4 ( <i>A few times a week</i> )  |
| Pork                                             | 0.1                         | 1.6               | 33.6                      | <b>46.9</b>                  | <b>17.7</b>  | 52.7 ( <i>A few times a week</i> )  |
| Milk and dairy products                          | <b>14.7</b>                 | <b>29.9</b>       | <b>40.8</b>               | 10.8                         | 3.8          | 32.8 ( <i>At least once a day</i> ) |
| Eggs                                             | 0.3                         | 2.2               | <b>51.3</b>               | 41.5                         | 4.7          | 68.9 ( <i>A few times a week</i> )  |
| Fish                                             | 0.3                         | 1.9               | <b>52.6</b>               | 37.9                         | 7.3          | 58.4 ( <i>A few times a week</i> )  |
| Leafy vegetables                                 | <b>20.2</b>                 | <b>27.7</b>       | 36.6                      | 10.9                         | 4.8          | 44.1 ( <i>At least once a day</i> ) |
| Other vegetables                                 | <b>20.2</b>                 | <b>31.7</b>       | 39.6                      | 6.3                          | 2.2          | 44.1 ( <i>At least once a day</i> ) |
| Fruit                                            | <b>38.6</b>                 | <b>30.6</b>       | 21.5                      | 6.9                          | 2.3          | 63.4 ( <i>At least once a day</i> ) |
| Dried/canned legumes                             | 0.5                         | <b>2.4</b>        | <b>37.4</b>               | 43.6                         | 16.1         | 52.0 ( <i>A few times a week</i> )  |
| Potatoes                                         | 0.2                         | 1.7               | <b>48.7</b>               | 46.4                         | 3.1          | <i>N.D.</i>                         |
| Salty snacks                                     | 0.9                         | 3.8               | 26.8                      | <b>50.2</b>                  | <b>18.3</b>  | 43.6 ( <i>A few times a week</i> )  |
| Sweets                                           | 4.3                         | 16.4              | 40.7                      | <b>33.1</b>                  | <b>5.5</b>   | 57.8 ( <i>A few times a week</i> )  |

**Note.** Percentages in bold indicate adequate consumption (consistent with guidelines). National data are taken from the public database of the national statistical institute (ISTAT, available at <http://dati.istat.it/>) and refer to the general Italian population between 18-34 years.
